# Supplementary material
Source: bioRxiv or medRxiv preprint supplement (https://www.biorxiv.org/highwire/filestream/44048/field_highwire_adjunct_files/1/130948-2.pdf)
Supplement: Supplementary file [file 130948-2.pdf]

# Supplementary Figure 2

**a**

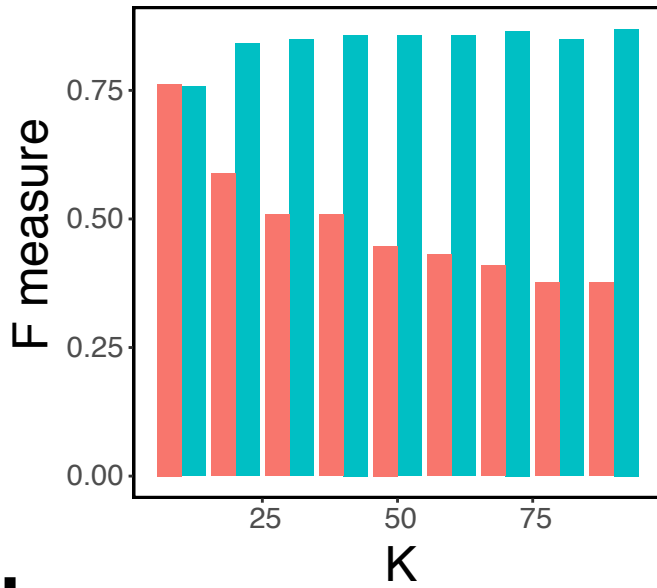

**b**

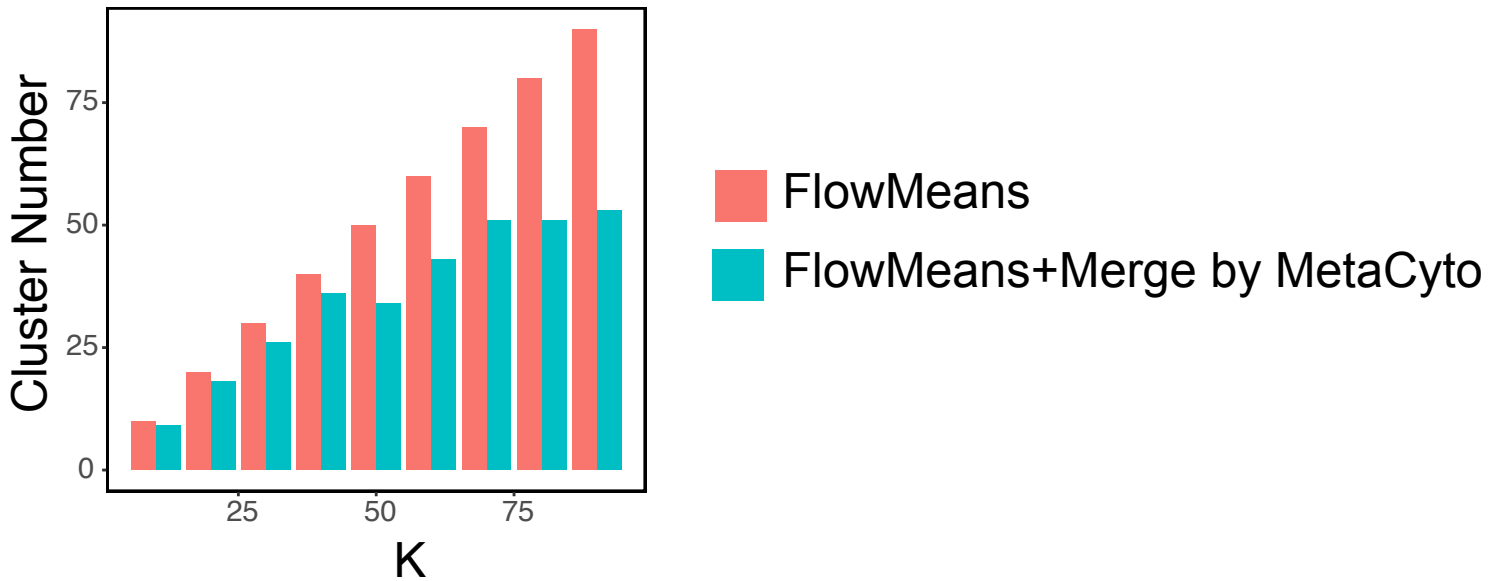

Supplementary Figure 2: MetaCyto is able to improve the quality and robustness of clustering results from FlowMeans. (a,b) FlowMeans is used to cluster FlowCAP WNV data with K ranging from 10 to 90 with or without MetaCyto. F measure (a) and the number of clusters (b) are showed in the bar plots.
